# Supplementary material for: Multiple Early Introductions of SARS-CoV-2 to Cape Town, South Africa
Source: MDPI journal article supplement (doi:10.3390/v13030526), 2021-03-22
Supplement: s1 [file s1]

**Supplementary Table 1.** Demographic information and Ct value

| Sequence Name | Collection Date | Gender  | Age | Health Sub-district | Ct E gene          | Ct RdRp | Ct N gene |
|---------------|-----------------|---------|-----|---------------------|--------------------|---------|-----------|
| Tygerberg_01  | 2020-03-17      | Male*   | 63  | Southern            | 12.40              | 16.11   | 17.01     |
| Tygerberg_02  | 2020-03-27      | Female  | 41  | Tygerberg           | 21.19              | 22.48   | 24.78     |
| Tygerberg_03  | 2020-03-27      | Female  | 32  | Tygerberg           | 12.66              | 15.15   | 17.30     |
| Tygerberg_04  | 2020-03-20      | Male**  | 65  | Southern            | 16.89              | 18.33   | 19.88     |
| Tygerberg_05  | 2020-03-17      | Male*** | 34  | Tygerberg           | 18.73              | 25.46   | 24.01     |
| Tygerberg_06  | 2020-03-20      | Female  | 33  | Tygerberg           | 18.67              | 20.59   | 22.12     |
| Tygerberg_07  | 2020-04-08      | Female  | 23  | Tygerberg           | 15.00              | 17.90   | 19.20     |
| Tygerberg_08  | 2020-04-08      | Female  | 28  | Tygerberg           | 20.09 <sup>#</sup> | None    | None      |
| Tygerberg_09  | 2020-04-08      | Female  | 29  | Tygerberg           | 20.90              | 22.50   | 25.40     |
| Tygerberg_10  | 2020-04-08      | Female  | 41  | Tygerberg           | 13.10              | 14.80   | 17.80     |
| Tygerberg_11  | 2020-04-07      | Female  | 50  | Northern            | 21.30              | 22.70   | 25.30     |
| Tygerberg_12  | 2020-04-08      | Female  | 23  | Tygerberg           | 17.20              | 19.30   | 21.20     |
| Tygerberg_13  | 2020-04-08      | Female  | 42  | Tygerberg           | 24.60              | 26.20   | 29.60     |
| Tygerberg_14  | 2020-04-08      | Female  | 28  | Tygerberg           | 21.80              | 23.10   | 26.00     |
| Tygerberg_15  | 2020-04-08      | Male    | 33  | Tygerberg           | 14.50              | 16.60   | 19.00     |
| Tygerberg_16  | 2020-04-08      | Female  | 38  | Tygerberg           | 17.10              | 19.00   | 22.10     |
| Tygerberg_17  | 2020-04-08      | Female  | 32  | Tygerberg           | 13.90              | 16.40   | 19.00     |
| Tygerberg_18  | 2020-04-08      | Female  | 23  | Tygerberg           | 15.60              | 17.70   | 20.60     |
| Tygerberg_19  | 2020-04-08      | Male    | 29  | Tygerberg           | 9.80               | 12.80   | 14.30     |
| Tygerberg_20  | 2020-04-09      | Male    | 29  | Northern            | 14.90              | 17.50   | 20.00     |
| Tygerberg_21  | 2020-04-09      | Female  | 26  | Northern            | 19.50              | 20.90   | 23.70     |
| Tygerberg_22  | 2020-04-09      | Female  | 22  | Northern            | 16.70              | 18.50   | 19.60     |
| Tygerberg_23  | 2020-04-09      | Female  | 40  | Northern            | 20.00              | 21.70   | 23.40     |
| Tygerberg_24  | 2020-04-09      | Female  | 40  | Northern            | 21.90              | 24.10   | 25.50     |
| Tygerberg_25  | 2020-04-09      | Female  | 29  | Northern            | 22.90              | 24.70   | 26.50     |
| Tygerberg_26  | 2020-04-09      | Female  | 24  | Northern            | 17.60              | 19.20   | 20.60     |
| Tygerberg_27  | 2020-04-09      | Female  | 32  | Northern            | 12.10              | 15.20   | 16.90     |
| Tygerberg_28  | 2020-04-09      | Female  | 22  | Northern            | 22.70              | 24.50   | 26.40     |
| Tygerberg_29  | 2020-03-26      | Male    | 52  | Tygerberg           | 26.26 <sup>#</sup> | None    | None      |
| Tygerberg_30  | 2020-03-29      | Male    | 86  | Tygerberg           | 23.93              | 25.17   | 27.95     |
| Tygerberg_31  | 2020-03-29      | Male    | 40  | Tygerberg           | 18.89              | 19.72   | 22.64     |
| Tygerberg_32  | 2020-03-30      | Female  | 81  | Tygerberg           | 30.63              | 33.41   | 37.12     |
| Tygerberg_33  | 2020-04-02      | Male    | 30  | Tygerberg           | Unknown            | Unknown | Unknown   |
| Tygerberg_34  | 2020-04-03      | Male    | 59  | Tygerberg           | Unknown            | Unknown | Unknown   |
| Tygerberg_35  | 2020-04-03      | Female  | 58  | Tygerberg           | Unknown            | Unknown | Unknown   |
| Tygerberg_36  | 2020-04-03      | Female  | 25  | Tygerberg           | Unknown            | Unknown | Unknown   |
| Tygerberg_37  | 2020-04-09      | Female  | 26  | Northern            | 22.20              | 24.10   | 26.10     |

|              |            |        |    |           |                    |       |       |
|--------------|------------|--------|----|-----------|--------------------|-------|-------|
| Tygerberg_38 | 2020-04-09 | Female | 47 | Northern  | 19·10              | 20·50 | 22·40 |
| Tygerberg_39 | 2020-04-09 | Female | 41 | Northern  | 38·18 <sup>#</sup> | None  | None  |
| Tygerberg_41 | 2020-04-08 | Male   | 10 | Eastern   | 28·40              | 29·20 | 31·70 |
| Tygerberg_42 | 2020-04-08 | Male   | 8  | Eastern   | 21·80              | 23·50 | 24·80 |
| Tygerberg_43 | 2020-04-07 | Male   | 55 | Eastern   | 24·70              | 26·50 | 27·90 |
| Tygerberg_44 | 2020-04-09 | Female | 29 | Eastern   | 21·60              | 23·50 | 24·80 |
| Tygerberg_45 | 2020-04-08 | Female | 14 | Eastern   | 22·90              | 24·60 | 27·40 |
| Tygerberg_46 | 2020-04-08 | Female | 63 | Eastern   | 25·90              | 28·10 | 29·00 |
| Tygerberg_47 | 2020-04-08 | Male   | 14 | Eastern   | 22·40              | 24·40 | 26·20 |
| Tygerberg_48 | 2020-04-08 | Male   | 20 | Eastern   | 23·20              | 25·00 | 26·70 |
| Tygerberg_49 | 2020-04-08 | Female | 44 | Eastern   | 33·80              | 37·00 | 37·30 |
| Tygerberg_50 | 2020-04-08 | Female | 26 | Tygerberg | 29·50              | 31·10 | 34·70 |

\* SA: travel to UK  
\*\* SA: travel to UK  
\*\*\* SA: travel to Netherlands  
# in house PCR

**Supplementary Table 2.** Genome coverage and Genome Detective results for 47 sequences

| Sequence Name | Begin | End   | Coverage | Score | Concordance | Matches         | Identities       | I/D/M/F |
|---------------|-------|-------|----------|-------|-------------|-----------------|------------------|---------|
| Tygerberg_01  | 31    | 29866 | 99.80%   | 59648 | 99.90%      | 29836<br>(100%) | 29830<br>(99.9%) | 0/0     |
| Tygerberg_02  | 31    | 29686 | 99.20%   | 59288 | 99.90%      | 29656<br>(100%) | 29650<br>(99.9%) | 0/0     |
| Tygerberg_03  | 31    | 29776 | 99.50%   | 59468 | 99.90%      | 29746<br>(100%) | 29740<br>(99.9%) | 0/0     |
| Tygerberg_04  | 31    | 29379 | 96.50%   | 57688 | 99.90%      | 28847<br>(100%) | 28844<br>(99.9%) | 0/0     |
| Tygerberg_05  | 31    | 29380 | 97.30%   | 58180 | 99.90%      | 29100<br>(100%) | 29095<br>(99.9%) | 0/0     |
| Tygerberg_06  | 31    | 29380 | 94.60%   | 56570 | 99.90%      | 28297<br>(100%) | 28291<br>(99.9%) | 0/0     |
| Tygerberg_07  | 31    | 29869 | 99.80%   | 59650 | 99.90%      | 29839<br>(100%) | 29832<br>(99.9%) | 0/0     |
| Tygerberg_08  | 31    | 29866 | 99.80%   | 59648 | 99.90%      | 29836<br>(100%) | 29830<br>(99.9%) | 0/0     |
| Tygerberg_09  | 31    | 29662 | 98.20%   | 58714 | 99.90%      | 29369<br>(100%) | 29363<br>(99.9%) | 0/0     |
| Tygerberg_10  | 31    | 29874 | 99.80%   | 59656 | 99.90%      | 29844<br>(100%) | 29836<br>(99.9%) | 0/0     |
| Tygerberg_11  | 31    | 29394 | 97.40%   | 58206 | 99.90%      | 29115<br>(100%) | 29109<br>(99.9%) | 0/0     |
| Tygerberg_12  | 31    | 29867 | 99.80%   | 59646 | 99.90%      | 29837<br>(100%) | 29830<br>(99.9%) | 0/0     |
| Tygerberg_13  | 31    | 29380 | 92.70%   | 55428 | 99.90%      | 27724<br>(100%) | 27719<br>(99.9%) | 0/0     |
| Tygerberg_14  | 31    | 29471 | 97.30%   | 58146 | 99.90%      | 29087<br>(100%) | 29080<br>(99.9%) | 0/0     |
| Tygerberg_15  | 31    | 29873 | 99.80%   | 59662 | 99.90%      | 29843<br>(100%) | 29837<br>(99.9%) | 0/0     |
| Tygerberg_16  | 31    | 29849 | 99.70%   | 59614 | 99.90%      | 29819<br>(100%) | 29813<br>(99.9%) | 0/0     |
| Tygerberg_17  | 31    | 29856 | 99.70%   | 59628 | 99.90%      | 29826<br>(100%) | 29820<br>(99.9%) | 0/0     |
| Tygerberg_18  | 31    | 29866 | 99.80%   | 59644 | 99.90%      | 29836<br>(100%) | 29829<br>(99.9%) | 0/0     |
| Tygerberg_19  | 31    | 29877 | 99.80%   | 59666 | 99.90%      | 29847<br>(100%) | 29840<br>(99.9%) | 0/0     |
| Tygerberg_20  | 31    | 29874 | 99.80%   | 59656 | 99.90%      | 29844<br>(100%) | 29836<br>(99.9%) | 0/0     |
| Tygerberg_21  | 31    | 29867 | 99.80%   | 59646 | 99.90%      | 29837<br>(100%) | 29830<br>(99.9%) | 0/0     |
| Tygerberg_22  | 31    | 29867 | 99.80%   | 59646 | 99.90%      | 29837<br>(100%) | 29830<br>(99.9%) | 0/0     |
| Tygerberg_23  | 19    | 29614 | 83.90%   | 50138 | 99.90%      | 25077<br>(100%) | 25073<br>(99.9%) | 0/0     |

|              |    |       |        |       |        |                  |                  |     |
|--------------|----|-------|--------|-------|--------|------------------|------------------|-----|
| Tygerberg_24 | 30 | 29667 | 98.20% | 58730 | 99.90% | 29377<br>(100%)  | 29371<br>(99.9%) | 0/0 |
| Tygerberg_25 | 31 | 29453 | 97.60% | 58324 | 99.90% | 29174<br>(100%)  | 29168<br>(99.9%) | 0/0 |
| Tygerberg_26 | 31 | 29866 | 99.80% | 59648 | 99.90% | 29836<br>(100%)  | 29830<br>(99.9%) | 0/0 |
| Tygerberg_27 | 31 | 29874 | 99.80% | 59652 | 99.90% | 29844<br>(100%)  | 29835<br>(99.9%) | 0/0 |
| Tygerberg_28 | 31 | 29676 | 98.20% | 58670 | 99.90% | 29351<br>(100%)  | 29341<br>(99.9%) | 0/0 |
| Tygerberg_29 | 31 | 29382 | 97.30% | 58178 | 99.90% | 29103<br>(100%)  | 29096<br>(99.9%) | 0/0 |
| Tygerberg_30 | 31 | 29381 | 96.30% | 57562 | 99.90% | 28805<br>(100%)  | 28793<br>(99.9%) | 0/0 |
| Tygerberg_31 | 31 | 29455 | 98.00% | 58574 | 99.90% | 29299<br>(100%)  | 29293<br>(99.9%) | 0/0 |
| Tygerberg_32 | 31 | 29381 | 90.40% | 54016 | 99.90% | 27030<br>(100%)  | 27019<br>(99.9%) | 0/0 |
| Tygerberg_33 | 31 | 29380 | 94.90% | 56750 | 99.90% | 28389<br>(100%)  | 28382<br>(99.9%) | 0/0 |
| Tygerberg_34 | 31 | 29783 | 99.50% | 59470 | 99.90% | 29753<br>(100%)  | 29744<br>(99.9%) | 0/0 |
| Tygerberg_35 | 31 | 29381 | 92.20% | 55096 | 99.90% | 27560<br>(100%)  | 27554<br>(99.9%) | 0/0 |
| Tygerberg_36 | 31 | 29690 | 98.00% | 58594 | 99.90% | 29311<br>(100%)  | 29304<br>(99.9%) | 0/0 |
| Tygerberg_37 | 31 | 29381 | 92.80% | 55450 | 99.90% | 27737<br>(100%)  | 27731<br>(99.9%) | 0/0 |
| Tygerberg_38 | 31 | 29395 | 96.90% | 57938 | 99.90% | 28981<br>(100%)  | 28975<br>(99.9%) | 0/0 |
| Tygerberg_41 | 31 | 29384 | 90.80% | 54264 | 99.90% | 27148<br>(100%)  | 27140<br>(99.9%) | 0/0 |
| Tygerberg_42 | 31 | 29386 | 96.50% | 57682 | 99.90% | 28855<br>(100%)  | 28848<br>(99.9%) | 0/0 |
| Tygerberg_43 | 12 | 29381 | 92.80% | 55478 | 99.90% | 27753<br>(100%)  | 27746<br>(99.9%) | 0/0 |
| Tygerberg_44 | 31 | 29705 | 99.20% | 59310 | 99.90% | 29675<br>(100%)  | 29665<br>(99.9%) | 0/0 |
| Tygerberg_45 | 31 | 29383 | 97.30% | 58182 | 99.90% | 29105<br>(100%)  | 29098<br>(99.9%) | 0/0 |
| Tygerberg_46 | 11 | 29877 | 99.90% | 59686 | 99.90% | 29867<br>(100%)  | 29855<br>(99.9%) | 0/0 |
| Tygerberg_47 | 31 | 29756 | 97.80% | 58468 | 99.90% | 29248<br>(100%)  | 29241<br>(99.9%) | 0/0 |
| Tygerberg_48 | 31 | 29866 | 99.80% | 59620 | 99.90% | 29836<br>(99.9%) | 29826<br>(99.9%) | 3/0 |
| Tygerberg_50 | 31 | 29384 | 91.80% | 54882 | 99.90% | 27451<br>(100%)  | 27446<br>(99.9%) | 0/0 |

**Supplementary Table 3.** GISAID Reference ID, Clade, and lineage information

| Sample_ID    | GISAID ID      | Collection Date | GISAID Clade | Next clade | Pangolin Lineage |
|--------------|----------------|-----------------|--------------|------------|------------------|
| Tygerberg_01 | EPI_ISL_464112 | 2020-03-17      | G            | 20A        | B·1·8            |
| Tygerberg_02 | EPI_ISL_464113 | 2020-03-27      | G            | 20A        | B·1·5            |
| Tygerberg_03 | EPI_ISL_464114 | 2020-03-27      | G            | 20A        | B·1·5            |
| Tygerberg_04 | EPI_ISL_464115 | 2020-03-20      | L            | 19A        | B                |
| Tygerberg_05 | EPI_ISL_464116 | 2020-03-17      | G            | 20A        | B·1·8            |
| Tygerberg_06 | EPI_ISL_464117 | 2020-03-20      | V            | 19A        | B·2·1            |
| Tygerberg_07 | EPI_ISL_464118 | 2020-04-08      | G            | 20A        | B·1·8            |
| Tygerberg_08 | EPI_ISL_464119 | 2020-04-08      | G            | 20A        | B·1·8            |
| Tygerberg_09 | EPI_ISL_464120 | 2020-04-08      | G            | 20A        | B·1·8            |
| Tygerberg_10 | EPI_ISL_464121 | 2020-04-08      | G            | 20A        | B·1·8            |
| Tygerberg_11 | EPI_ISL_464122 | 2020-04-07      | G            | 20A        | B·1·8            |
| Tygerberg_12 | EPI_ISL_464123 | 2020-04-08      | G            | 20A        | B·1·8            |
| Tygerberg_13 | EPI_ISL_464124 | 2020-04-08      | G            | 20A        | B·1·8            |
| Tygerberg_14 | EPI_ISL_464125 | 2020-04-08      | G            | 20A        | B·1·8            |
| Tygerberg_15 | EPI_ISL_464126 | 2020-04-08      | G            | 20A        | B·1·8            |
| Tygerberg_16 | EPI_ISL_464127 | 2020-04-08      | G            | 20A        | B·1·8            |
| Tygerberg_17 | EPI_ISL_464128 | 2020-04-08      | G            | 20A        | B·1·8            |
| Tygerberg_18 | EPI_ISL_464129 | 2020-04-08      | G            | 20A        | B·1·8            |
| Tygerberg_19 | EPI_ISL_464130 | 2020-04-08      | G            | 20A        | B·1·8            |
| Tygerberg_20 | EPI_ISL_464131 | 2020-04-09      | G            | 20A        | B·1·8            |
| Tygerberg_21 | EPI_ISL_464132 | 2020-04-09      | G            | 20A        | B·1·8            |
| Tygerberg_22 | EPI_ISL_464133 | 2020-04-09      | G            | 20A        | B·1·8            |
| Tygerberg_23 | EPI_ISL_464134 | 2020-04-09      | G            | 20A        | B·1·5            |
| Tygerberg_24 | EPI_ISL_464135 | 2020-04-09      | G            | 20A        | B·1·8            |
| Tygerberg_25 | EPI_ISL_464136 | 2020-04-09      | G            | 20A        | B·1·8            |
| Tygerberg_26 | EPI_ISL_464137 | 2020-04-09      | G            | 20A        | B·1·8            |
| Tygerberg_27 | EPI_ISL_464138 | 2020-04-09      | G            | 20A        | B·1·8            |
| Tygerberg_28 | EPI_ISL_464139 | 2020-04-09      | G            | 20A        | B·1·8            |
| Tygerberg_29 | EPI_ISL_464140 | 2020-03-26      | Other        | 20B        | B·1·1            |
| Tygerberg_30 | EPI_ISL_464141 | 2020-03-29      | GR           | 20B        | B·1·1·1          |
| Tygerberg_31 | EPI_ISL_464142 | 2020-03-29      | Other        | 19A        | B·2·2            |
| Tygerberg_32 | EPI_ISL_464143 | 2020-03-30      | GR           | 20B        | B·1·1·1          |
| Tygerberg_33 | EPI_ISL_464144 | 2020-04-02      | GR           | 20B        | B·1·1            |
| Tygerberg_34 | EPI_ISL_464145 | 2020-04-03      | GR           | 20B        | B·1·1            |
| Tygerberg_35 | EPI_ISL_464146 | 2020-04-03      | GR           | 20B        | B·1·1            |
| Tygerberg_36 | EPI_ISL_464147 | 2020-04-03      | GR           | 20B        | B·1·1            |
| Tygerberg_37 | EPI_ISL_464148 | 2020-04-09      | G            | 20A        | B·1·8            |
| Tygerberg_38 | EPI_ISL_464149 | 2020-04-09      | G            | 20A        | B·1·8            |
| Tygerberg_41 | EPI_ISL_464150 | 2020-04-08      | GR           | 20B        | B·1·1·26         |
| Tygerberg_42 | EPI_ISL_464151 | 2020-04-08      | GR           | 20B        | B·1·1            |

|              |                |            |    |     |       |
|--------------|----------------|------------|----|-----|-------|
| Tygerberg_43 | EPI_ISL_464152 | 2020-04-07 | GR | 20B | B·1·1 |
| Tygerberg_44 | EPI_ISL_464153 | 2020-04-09 | GR | 20B | B·1·1 |
| Tygerberg_45 | EPI_ISL_464154 | 2020-04-08 | GR | 20B | B·1·1 |
| Tygerberg_46 | EPI_ISL_464155 | 2020-04-08 | GR | 20B | B·1·1 |
| Tygerberg_47 | EPI_ISL_464156 | 2020-04-08 | GR | 20B | B·1·1 |
| Tygerberg_48 | EPI_ISL_464157 | 2020-04-08 | GR | 20B | B·1·1 |
| Tygerberg_50 | EPI_ISL_464158 | 2020-04-08 | G  | 20A | B·1·8 |

**Supplementary Table 4.** Total number and mutations of 47 sequences

| Sample_ID    | Total Mutations | Mutations                                                                                                          |
|--------------|-----------------|--------------------------------------------------------------------------------------------------------------------|
| Tygerberg_01 | 6               | 241C>T, 3037C>T, 5209A>G, 14408C>T, 23403A>G, 24862A>G                                                             |
| Tygerberg_02 | 6               | 241C>T, 3037C>T, 14408C>T, 20268A>G, 23403A>G, 28854C>T                                                            |
| Tygerberg_03 | 6               | 241C>T, 3037C>T, 14408C>T, 20268A>G, 23403A>G, 28854C>T                                                            |
| Tygerberg_04 | 0               | None                                                                                                               |
| Tygerberg_05 | 5               | 241C>T, 3037C>T, 14408C>T, 23403A>G, 24862A>G                                                                      |
| Tygerberg_06 | 6               | 2480A>G, 2558C>T, 11083G>T, 14805C>T, 17977C>T, 26144G>T                                                           |
| Tygerberg_07 | 7               | 241C>T, 3037C>T, 5209A>G, 14408C>T, 23403A>G, 24862A>G, 27923C>T                                                   |
| Tygerberg_08 | 6               | 241C>T, 3037C>T, 5209A>G, 14408C>T, 23403A>G, 24862A>G                                                             |
| Tygerberg_09 | 6               | 241C>T, 3037C>T, 5209A>G, 14408C>T, 23403A>G, 24862A>G                                                             |
| Tygerberg_10 | 8               | 241C>T, 3037C>T, 5209A>G, 11674C>T, 14408C>T, 23403A>G, 24862A>G, 25996G>C                                         |
| Tygerberg_11 | 6               | 241C>T, 3037C>T, 5209A>G, 14408C>T, 23403A>G, 24862A>G                                                             |
| Tygerberg_12 | 7               | 241C>T, 3037C>T, 5209A>G, 13991A>G, 14408C>T, 23403A>G, 24862A>G                                                   |
| Tygerberg_13 | 5               | 241C>T, 5209A>G, 14408C>T, 23403A>G, 24862A>G                                                                      |
| Tygerberg_14 | 7               | 241C>T, 626G>T, 3037C>T, 5209A>G, 14408C>T, 23403A>G, 24862A>G                                                     |
| Tygerberg_15 | 6               | 241C>T, 3037C>T, 5209A>G, 14408C>T, 23403A>G, 24862A>G                                                             |
| Tygerberg_16 | 6               | 241C>T, 3037C>T, 5209A>G, 14408C>T, 23403A>G, 24862A>G                                                             |
| Tygerberg_17 | 6               | 241C>T, 3037C>T, 5209A>G, 14408C>T, 23403A>G, 24862A>G                                                             |
| Tygerberg_18 | 7               | 241C>T, 3037C>T, 5209A>G, 9865T>G, 14408C>T, 23403A>G, 24862A>G                                                    |
| Tygerberg_19 | 7               | 241C>T, 3037C>T, 5209A>G, 13991A>G, 14408C>T, 23403A>G, 24862A>G                                                   |
| Tygerberg_20 | 6               | 241C>T, 3037C>T, 5209A>G, 11674C>T, 14408C>T, 23403A>G, 24862A>G, 25996G>C                                         |
| Tygerberg_21 | 7               | 241C>T, 3037C>T, 5209A>G, 9865T>G, 14408C>T, 23403A>G, 24862A>G                                                    |
| Tygerberg_22 | 7               | 241C>T, 3037C>T, 5209A>G, 14408C>T, 19186C>T, 23403A>G, 24862A>G                                                   |
| Tygerberg_23 | 4               | 241C>T, 14408C>T, 23403A>G, 24862A>G                                                                               |
| Tygerberg_24 | 6               | 241C>T, 3037C>T, 5209A>G, 14408C>T, 23403A>G, 24862A>G                                                             |
| Tygerberg_25 | 6               | 241C>T, 3037C>T, 5209A>G, 14408C>T, 23403A>G, 24862A>G                                                             |
| Tygerberg_26 | 6               | 241C>T, 3037C>T, 5209A>G, 14408C>T, 23403A>G, 24862A>G                                                             |
| Tygerberg_27 | 9               | 241C>T, 3037C>T, 5209A>G, 13748A>G, 14408C>T, 23403A>G, 24862A>G, 28373G>T, 29227G>T                               |
| Tygerberg_28 | 6               | 241C>T, 3037C>T, 5209A>G, 14408C>T, 23403A>G, 24862A>G                                                             |
| Tygerberg_29 | 7               | 241C>T, 3037C>T, 9223C>T, 13536C>T, 28881G>A, 28882G>A, 28883G>C                                                   |
| Tygerberg_30 | 12              | 241C>T, 3037C>T, 4002C>T, 10097G>A, 13536C>T, 14408C>T, 23403A>G, 23731C>T, 25169C>T, 28881G>A, 28882G>A, 28883G>C |
| Tygerberg_31 | 6               | 1515A>G, 9223C>T, 14805C>T, 17247T>C, 18568C>T, 26144G>T                                                           |
| Tygerberg_32 | 11              | 241C>T, 4002C>T, 10097G>A, 13536C>T, 14408C>T, 23403A>G, 23731C>T, 25169C>T, 28881G>A, 28882G>A, 28883G>C          |
| Tygerberg_33 | 7               | 241C>T, 3037C>T, 14408C>T, 23403A>G, 28881G>A, 28882G>A, 28883G>C                                                  |
| Tygerberg_34 | 7               | 241C>T, 3037C>T, 14408C>T, 23403A>G, 24389A>C, 24390G>C, 28881G>A, 28882G>A, 28883G>C                              |

|              |   |                                                                                                                  |
|--------------|---|------------------------------------------------------------------------------------------------------------------|
| Tygerberg_35 | 6 | 241C>T, 14408C>T, 23403A>G, 28881G>A, 28882G>A, 28883G>C                                                         |
| Tygerberg_36 | 7 | 241C>T, 3037C>T, 14408C>T, 23403A>G, 28881G>A, 28882G>A, 28883G>C                                                |
| Tygerberg_37 | 6 | 241C>T, 5209A>G, 7798G>T, 14408C>T, 23403A>G, 24862A>G                                                           |
| Tygerberg_38 | 6 | 241C>T, 3037C>T, 5209A>G, 14408C>T, 23403A>G, 24862A>G                                                           |
| Tygerberg_41 | 8 | 241C>T, 6037C>T, 14408C>T, 23403A>G, 25792C>T, 28881G>A, 28882G>A, 28883G>C                                      |
| Tygerberg_42 | 7 | 241C>T, 3037C>T, 14408C>T, 23403A>G, 28881G>A, 28882G>A, 28883G>C                                                |
| Tygerberg_43 | 7 | 241C>T, 14408C>T, 23403A>G, 28300G>T, 28881G>A, 28882G>A, 28883G>C                                               |
| Tygerberg_44 | 7 | 241C>T, 3037C>T, 8022T>G, 14408C>T, 23403A>G, 24389A>C, 24390G>C, 28881G>A, 28882G>A, 28883G>C                   |
| Tygerberg_45 | 7 | 241C>T, 3037C>T, 14408C>T, 23403A>G, 28881G>A, 28882G>A, 28883G>C                                                |
| Tygerberg_46 | 9 | 241C>T, 3037C>T, 6555C>G, 6560T>G, 8022T>G, 14408C>T, 23403A>G, 24389A>C, 24390G>C, 28881G>A, 28882G>A, 28883G>C |
| Tygerberg_47 | 7 | 241C>T, 3037C>T, 14408C>T, 23403A>G, 28881G>A, 28882G>A, 28883G>C                                                |
| Tygerberg_48 | 7 | 241C>T, 3037C>T, 8022T>G, 14408C>T, 23403A>G, 24389A>C, 24390G>C, 28881G>A, 28882G>A, 28883G>C                   |
| Tygerberg_50 | 5 | 241C>T, 5209A>G, 14408C>T, 23403A>G, 24862A>G                                                                    |
